# Supplementary material
Source: PubMed Central journal article supplement (PMC2685946)
Supplement: dev.032607_3.pdf [file dev.032607_3.pdf]

**Table S1. Properties and purification of SDF-3**

|                       | Conditions                 | Activity (%) |
|-----------------------|----------------------------|--------------|
| Anion-exchange resin  | Flow-through               | 50-100       |
|                       | Elution with 1 M NaCl      | <0.1         |
| Cation-exchange resin | Flow-through               | 50-100       |
|                       | Elution with 1 M NaCl      | <0.1         |
| Amberlite XAD-2 resin | Flow-through               | <0.1         |
|                       | Elution with 50% ethanol   | <0.1         |
|                       | Elution with 80% ethanol   | 50-100       |
| Heat treatment        | 95°C for 15 minutes        | 50-100       |
| Proteinase K          | 0.1 mg/ml, 55°C for 1 hour | 50-100       |
| Chloroform extraction | Water phase                | 1-2          |
|                       | Chloroform phase           | 50-100       |

$1 \times 10^8$  *gadA*<sup>-</sup> cells were developed on filters for 24 hours. The cells were dissociated in cAMP buffer and spun down. Activity was quantitated by serial dilution, with 1 unit being the minimal amount required to obtain full induction in the KP cell bioassay. 1000 units of SDF-3 were detected in the supernatant and used for characterization of the activity. Aliquots of the samples were incubated with various affinity resins then washed and eluted with the indicated solutions. SDF-3 activity was quantitated in the KP cell bioassay. Each purification step was repeated at least three times.
