# Supplementary material
Source: PubMed Central journal article supplement (PMC2685946)
Supplement: dev.032607_4.pdf [file dev.032607_4.pdf]

**Table S2. Production of SDF-3 during development**

| Development time (hours) | Secreted SDF-3 units/ $10^3$ cells | Cell-associated SDF-3 units/ $10^3$ cells |
|--------------------------|------------------------------------|-------------------------------------------|
| 16, 18, 20               | $<10^{-4}$                         | $<10^{-4}$                                |
| 22                       | $10^{-2}$                          | 0.2-0.4                                   |
| 24                       | $10^{-2}$                          | 0.4                                       |

For each time point,  $1 \times 10^8$  wild-type AX4 cells were developed on a filter. At the indicated times, cells were collected, dissociated in water and pelleted. Secreted SDF-3 was purified from the supernatant on Amberlite XAD-2, eluted, diluted and tested on KP cells. Cell-associated SDF-3 was extracted from the pelleted cells with chloroform. After evaporation, SDF-3 was recovered in 10% ethanol and purified on Amberlite XAD-2. Two different time courses were performed and gave the same range of SDF-3 activity.
