# Supplementary material
Source: PubMed Central journal article supplement (PMC2685946)

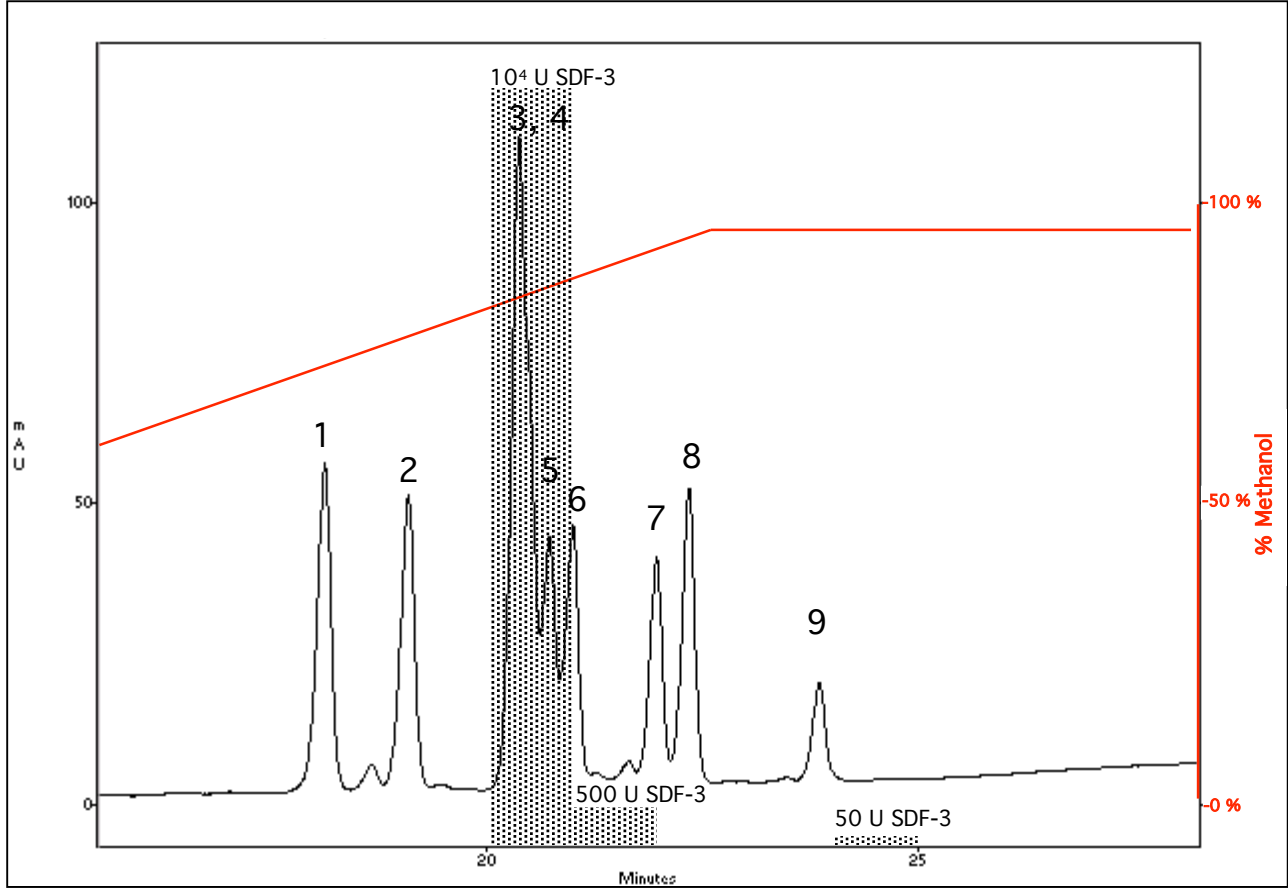

Supplement: dev.032607_1.pdf [file dev.032607_1.pdf]

A

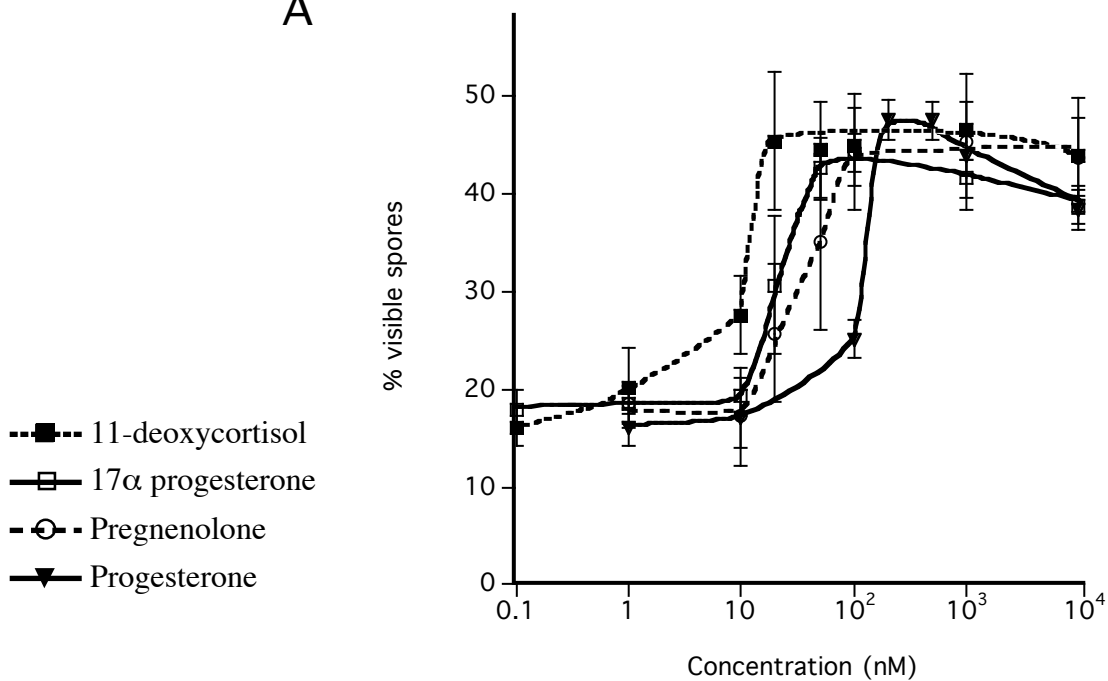

B

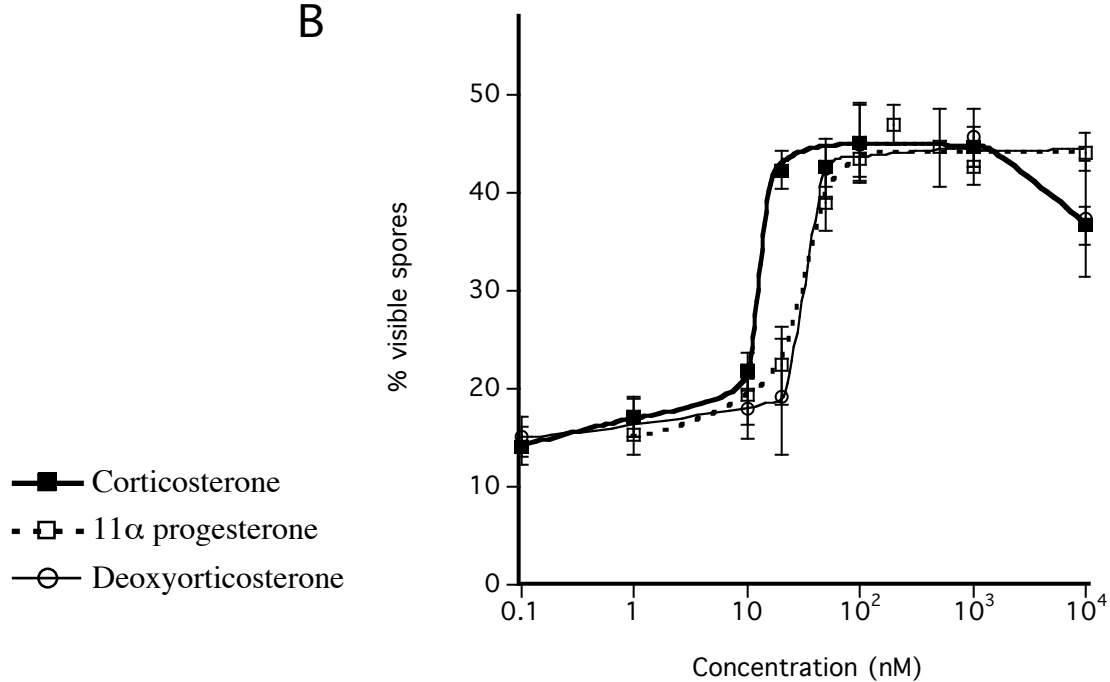

Supplement: dev.032607_2.pdf [file dev.032607_2.pdf]
